# Supplementary material
Source: PubMed Central journal article supplement (PMC9045903)
Supplement: boe-13-4-2516-s001.pdf [file boe-13-4-2516-s001.pdf]

## Theoretical investigation of photon partial pathlengths in multilayered turbid media: supplement

HÉCTOR A. GARCÍA,\*  DEMIÁN A. VERA, MARÍA. V. WAKS SERRA, GUIDO R. BAEZ,  DANIELA I. IRIARTE, AND JUAN A. POMARICO

*CIFICEN (UNCPBA-CONICET-CICPBA), Pinto 399, B7000GHG Tandil, Argentina*

*\*hgarcia@exa.unicen.edu.ar*

---

This supplement published with Optica Publishing Group on 28 March 2022 by The Authors under the terms of the [Creative Commons Attribution 4.0 License](https://creativecommons.org/licenses/by/4.0/) in the format provided by the authors and unedited. Further distribution of this work must maintain attribution to the author(s) and the published article's title, journal citation, and DOI.

Supplement DOI: <https://doi.org/10.6084/m9.figshare.19121702>

Parent Article DOI: <https://doi.org/10.1364/BOE.449514>

# Theoretical investigation of photons partial pathlengths in multilayered turbid media: supplemental document

In this supplementary material we introduce the needed expressions to compute the mean partial pathlengths (MPPLs) of photons in three- and four-layered media, according to the details shown in the accompanying paper.

## THREE AND FOUR-LAYERED MEDIA MEAN PARTIAL PATHLENGTHS

### Three-layered media

Following the reasoning described in Section 2 of the manuscript, for three-layered media the computation of analytical expressions of  $R(\rho)$  and, thus, of the MPPLs, require the use of  $\beta_N$  and  $\gamma_N$  and their derivatives with respect to  $\mu_{a,i}$ :

$$\beta_3 = D_2 \alpha_2 n_2^2 \cosh(\alpha_2 l_2) + D_3 \alpha_3 n_3^2 \sinh(\alpha_2 l_2) \quad (S1)$$

$$\gamma_3 = D_2 \alpha_2 n_2^2 \sinh(\alpha_2 l_2) + D_3 \alpha_3 n_3^2 \cosh(\alpha_2 l_2). \quad (S2)$$

From these expressions we obtain:

$$\frac{\partial \beta_3}{\partial \alpha_2} \frac{\partial \alpha_2}{\partial \mu_{a,2}} = \left\{ D_2 n_2^2 [\cosh(\alpha_2 l_2) + \alpha_2 l_2 \sinh(\alpha_2 l_2)] + D_3 n_3^2 \alpha_3 l_2 \cosh(\alpha_2 l_2) \right\} \frac{\partial \alpha_2}{\partial \mu_{a,2}}, \quad (S3)$$

$$\frac{\partial \gamma_3}{\partial \alpha_2} \frac{\partial \alpha_2}{\partial \mu_{a,2}} = \left\{ D_2 n_2^2 [\sinh(\alpha_2 l_2) + \alpha_2 l_2 \cosh(\alpha_2 l_2)] + D_3 n_3^2 \alpha_3 l_2 \sinh(\alpha_2 l_2) \right\} \frac{\partial \alpha_2}{\partial \mu_{a,2}}, \quad (S4)$$

$$\frac{\partial \beta_3}{\partial \alpha_3} \frac{\partial \alpha_3}{\partial \mu_{a,3}} = D_3 n_3^2 \sinh(\alpha_2 l_2) \frac{\partial \alpha_3}{\partial \mu_{a,3}}, \quad (S5)$$

$$\frac{\partial \gamma_3}{\partial \alpha_3} \frac{\partial \alpha_3}{\partial \mu_{a,3}} = D_3 n_3^2 \cosh(\alpha_2 l_2) \frac{\partial \alpha_3}{\partial \mu_{a,3}}; \quad (S6)$$

with:

$$\frac{\partial \alpha_2}{\partial \mu_{a,2}} = \frac{1}{2D_2 \alpha_2}, \quad (S7)$$

$$\frac{\partial \alpha_3}{\partial \mu_{a,3}} = \frac{1}{2D_3 \alpha_3}. \quad (S8)$$

We refer again to Eqs. (12-16), where the Green's function is written as:

$$G_1(\alpha_1, \alpha_2) = \mathcal{A}(\alpha_1) + \mathcal{B}(\alpha_1) \mathcal{C}(\alpha_1, \alpha_2), \quad (S9)$$

and separated as:

$$\mathcal{A}(\alpha_1) = \frac{e^{-\alpha_1 z_0} - e^{-\alpha_1(z_0 + 2z_{b,1})}}{2\alpha_1 D_1}, \quad (S10)$$

$$\mathcal{B}(\alpha_1) = \frac{\sinh[\alpha_1(z_0 + z_{b,1})] \sinh(\alpha_1 z_{b,1})}{D_1 \alpha_1 e^{\alpha_1(l_1 + z_{b,1})}}, \quad (S11)$$

$$\mathcal{C}(\alpha_1, \alpha_2, \alpha_3) = \frac{D_1 \alpha_1 n_1^2 \beta_3 - D_2 \alpha_2 n_2^2 \gamma_3}{D_1 \alpha_1 n_1^2 \beta_3 \cosh[\alpha_1(l_1 + z_{b,1})] + D_2 \alpha_2 n_2^2 \gamma_3 \sinh[\alpha_1(l_1 + z_{b,1})]}. \quad (S12)$$

Thus, the derivatives of the Green's function are:

$$\frac{\partial G_1}{\partial \alpha_1} \frac{\partial \alpha_1}{\partial \mu_{a,1}} = \left( \frac{\partial \mathcal{A}}{\partial \alpha_1} + \frac{\partial \mathcal{B}}{\partial \alpha_1} \mathcal{C} + \frac{\partial \mathcal{C}}{\partial \alpha_1} \mathcal{B} \right) \frac{\partial \alpha_1}{\mu_{a,1}} \quad (\text{S13})$$

$$\frac{\partial G_1}{\partial \alpha_2} \frac{\partial \alpha_2}{\partial \mu_{a,2}} = \frac{\partial \mathcal{C}}{\partial \alpha_2} \frac{\partial \alpha_2}{\partial \mu_{a,2}} \cdot \mathcal{B} \quad (\text{S14})$$

$$\frac{\partial G_1}{\partial \alpha_3} \frac{\partial \alpha_3}{\partial \mu_{a,3}} = \frac{\partial \mathcal{C}}{\partial \alpha_3} \frac{\partial \alpha_3}{\partial \mu_{a,3}} \cdot \mathcal{B}. \quad (\text{S15})$$

We use the notation:

$$\delta = D_1 n_1^2 \alpha_1 \beta_3 - D_2 n_2^2 \alpha_2 \gamma_3, \quad (\text{S16})$$

$$\Delta = D_1 n_1^2 \alpha_1 \beta_3 \cosh [\alpha_1 (l_1 + z_{b,1})] - D_2 n_2^2 \alpha_2 \gamma_3 \sinh [\alpha_1 (l_1 + z_{b,1})], \quad (\text{S17})$$

so the term  $\mathcal{C}$  becomes:

$$\mathcal{C} = \frac{\delta}{\Delta} \Rightarrow \frac{\partial \mathcal{C}}{\partial \alpha_i} = \left( \frac{\partial \delta}{\partial \alpha_i} \cdot \Delta - \frac{\partial \Delta}{\partial \alpha_i} \cdot \delta \right) \cdot \Delta^{-2}. \quad (\text{S18})$$

From now on, we will use Eq. (S18) in terms of  $\delta$  and  $\Delta$  to compute  $\mathcal{C}$  and its derivatives. Next, from expression Eq. (S13) we have:

$$\frac{\partial \mathcal{A}}{\partial \alpha_1} = \frac{e^{-\alpha_1 z_0}}{2D_1 \alpha_1^2} \left[ \alpha_1 (z_0 + 2z_{b,1}) e^{-2z_{b,1}} - \alpha_1 z_0 - 1 \right]. \quad (\text{S19})$$

$$\frac{\partial \mathcal{B}}{\partial \alpha_1} = \frac{e^{-\alpha_1 (l_1 + z_{b,1})}}{D_1 \alpha_1} \left( \{ (z_0 + z_{b,1}) \cosh [\alpha_1 (z_0 + z_{b,1})] \sinh (\alpha_1 z_{b,1}) + z_{b,1} \sinh [\alpha_1 (z_0 + z_{b,1})] \cosh (\alpha_1 z_{b,1}) \} \alpha_1 - \sinh [\alpha_1 (z_0 + z_{b,1})] \sinh (\alpha_1 z_{b,1}) [1 + \alpha_1 (l_1 + z_{b,1})] \right). \quad (\text{S20})$$

And, referring to Eq. (S18):

$$\frac{\partial \delta}{\partial \alpha_1} = D_1 n_1^2 \beta_3. \quad (\text{S21})$$

$$\frac{\partial \Delta}{\partial \alpha_1} = \left[ D_1 n_1^2 \beta_3 + D_2 n_2^2 \alpha_2 \gamma_3 (l_1 + z_{b,1}) \right] \cosh [\alpha_1 (l_1 + z_{b,1})] + \quad (\text{S22})$$

$$D_1 n_1^2 \beta_3 \alpha_1 \sinh [\alpha_1 (l_1 + z_{b,1})] (l_1 + z_{b,1}). \quad (\text{S23})$$

And, for  $L_2$  and  $L_3$ :

$$\frac{\partial \delta}{\partial \alpha_2} = D_1 n_1^2 \alpha_1 \beta_{3,2} - D_2 n_2^2 (\gamma_3 + \alpha_2 \gamma_{3,2}), \quad (\text{S24})$$

$$\frac{\partial \Delta}{\partial \alpha_2} = D_1 n_1^2 \alpha_1 \cosh [\alpha_1 (l_1 + z_{b,1})] \beta_{3,2} + D_2 n_2^2 \sinh [\alpha_1 (l_1 + z_{b,1})] [\gamma_{3,2} \alpha_2 + \gamma_3], \quad (\text{S25})$$

$$\frac{\partial \delta}{\partial \alpha_3} = D_1 n_1^2 \alpha_1 \beta_{3,3} - D_2 n_2^2 \alpha_2 \gamma_{3,3}, \quad (\text{S26})$$

$$\frac{\partial \Delta}{\partial \alpha_3} = D_1 n_1^2 \alpha_1 \beta_{3,3} \cosh [\alpha_1 (l_1 + z_{b,1})] - D_2 n_2^2 \alpha_2 \gamma_{3,3} \sinh [\alpha_1 (l_1 + z_{b,1})]. \quad (\text{S27})$$

$$(\text{S28})$$

Here:

$$\beta_{3,j} = \frac{\partial \beta_3}{\partial \alpha_j}, \quad \gamma_{3,j} = \frac{\partial \gamma_3}{\partial \alpha_j}, \quad (\text{S29})$$

Expressions from Eq. (S1) to Eq. (S29) are used in:

$$\frac{\partial R}{\partial \mu_{a,j}} = \frac{1}{4A_n \pi^2 R_{\text{EB}}^2} \sum_{n=1}^{\infty} \left[ \frac{\partial G_1(\alpha)}{\partial \mu_{a,j}} \frac{J_0(s_n \rho)}{J_1^2(s_n R_{\text{EB}})} \right]. \quad (\text{S30})$$

This quantities, in combination with  $R(\rho)$ , can be used to compute  $L_1$ ,  $L_2$  and  $L_3$ :

$$L_j(\lambda, \rho) = -\frac{1}{R(\rho)} \frac{\partial R(\rho)}{\partial \mu_{a,j}(\lambda)}. \quad (\text{S31})$$

Thus:

$$\begin{aligned} L_1 = & -\frac{1}{R(\rho)} \times \frac{1}{4A_n \pi^2 R_{\text{EB}}^2} \sum_{n=1}^{\infty} \left\{ \frac{e^{-\alpha_1 z_0}}{2D_1 \alpha_1^2} \left[ \alpha_1 (z_0 + 2z_{b,1}) e^{-2z_{b,1}} - \alpha_1 z_0 - 1 \right] + \right. \\ & \frac{e^{-\alpha_1 (l_1 + z_{b,1})}}{D_1 \alpha_1} \left( \{ (z_0 + z_{b,1}) \cosh [\alpha_1 (z_0 + z_{b,1})] \sinh (\alpha_1 z_{b,1}) + z_{b,1} \sinh [\alpha_1 (z_0 + \right. \\ & z_{b,1})] \cosh (\alpha_1 z_{b,1}) \} \alpha_1 - \sinh [\alpha_1 (z_0 + z_{b,1})] \sinh (\alpha_1 z_{b,1}) [1 + \alpha_1 (l_1 + z_{b,1})] \left. \right) \times \frac{\delta}{\Delta} + \\ & \left. \left( \frac{\partial \delta}{\partial \alpha_1} \cdot \Delta - \frac{\partial \Delta}{\partial \alpha_1} \cdot \delta \right) \cdot \Delta^{-2} \times \frac{\sinh [\alpha_1 (z_0 + z_{b,1})] \sinh (\alpha_1 z_{b,1})}{D_1 \alpha_1 e^{\alpha_1 (l_1 + z_{b,1})}} \right\}, \end{aligned} \quad (\text{S32})$$

$$L_2 = -\frac{1}{R(\rho)} \times \frac{1}{4A_n \pi^2 R_{\text{EB}}^2} \sum_{n=1}^{\infty} \left\{ \left( \frac{\partial \delta}{\partial \alpha_1} \cdot \Delta - \frac{\partial \Delta}{\partial \alpha_2} \cdot \delta \right) \cdot \Delta^{-2} \times \frac{\sinh [\alpha_2 (z_0 + z_{b,1})] \sinh (\alpha_1 z_{b,1})}{D_1 \alpha_1 e^{\alpha_1 (l_1 + z_{b,1})}} \right\}, \quad (\text{S33})$$

$$L_3 = -\frac{1}{R(\rho)} \times \frac{1}{4A_n \pi^2 R_{\text{EB}}^2} \sum_{n=1}^{\infty} \left\{ \left( \frac{\partial \delta}{\partial \alpha_1} \cdot \Delta - \frac{\partial \Delta}{\partial \alpha_2} \cdot \delta \right) \cdot \Delta^{-2} \times \frac{\sinh [\alpha_3 (z_0 + z_{b,1})] \sinh (\alpha_3 z_{b,1})}{D_1 \alpha_1 e^{\alpha_1 (l_1 + z_{b,1})}} \right\}. \quad (\text{S34})$$

#### Four-layered media

The procedure for finding the mean partial pathlengths of a four-layered media is quite similar to that described in the previous section. The main difference is the dependence of  $\mathcal{C}$  with  $\mu_{a,4}$  through the parameter  $\alpha_4$ :

$$\mathcal{C}(\alpha_1, \alpha_2, \alpha_3, \alpha_4) = \frac{D_1 \alpha_1 n_1^2 \beta_3 - D_2 \alpha_2 n_2^2 \gamma_3}{D_1 \alpha_1 n_1^2 \beta_3 \cosh [\alpha_1 (l_1 + z_{b,1})] + D_2 \alpha_2 n_2^2 \gamma_3 \sinh [\alpha_1 (l_1 + z_{b,1})]}. \quad (\text{S35})$$

Now, the factors  $\beta$  and  $\gamma$ , which have the form:

$$\beta_3 = D_2 \alpha_2 n_2^2 \beta_4 \cosh (\alpha_2 l_2) + D_3 \alpha_3 n_3^2 \gamma_4 \sinh (\alpha_2 l_2), \quad (\text{S36})$$

$$\gamma_3 = D_2 \alpha_2 n_2^2 \beta_4 \sinh (\alpha_2 l_2) + D_3 \alpha_3 n_3^2 \gamma_4 \cosh (\alpha_2 l_2), \quad (\text{S37})$$

$$\beta_4 = D_3 n_3^2 \alpha_3 \cosh (\alpha_3 l_3) + D_4 n_4^2 \alpha_4 \sinh (\alpha_3 l_3), \quad (\text{S38})$$

$$\gamma_4 = D_3 n_3^2 \alpha_3 \sinh (\alpha_3 l_3) + D_4 n_4^2 \alpha_4 \cosh (\alpha_3 l_3), \quad (\text{S39})$$

are needed. From these expressions, their derivatives are easily obtained:

$$\frac{\partial \beta_3}{\partial \alpha_2} \frac{\partial \alpha_2}{\mu_{a,2}} = \left\{ D_2 n_2^2 \beta_4 [\cosh(\alpha_2 l_2) + \alpha_2 l_2 \sinh(\alpha_2 l_2)] + D_3 n_3^2 \alpha_3 \gamma_4 l_2 \cosh(\alpha_2 l_2) \right\} \frac{\partial \alpha_2}{\partial \mu_{a,2}}. \quad (\text{S40})$$

$$\frac{\partial \gamma_3}{\partial \alpha_2} \frac{\partial \alpha_2}{\mu_{a,2}} = \left\{ D_2 n_2^2 \beta_4 [\sinh(\alpha_2 l_2) + \alpha_2 l_2 \cosh(\alpha_2 l_2)] + D_3 n_3^2 \alpha_3 \gamma_4 l_2 \sinh(\alpha_2 l_2) \right\} \frac{\partial \alpha_2}{\partial \mu_{a,2}}. \quad (\text{S41})$$

$$\frac{\partial \beta_3}{\partial \alpha_3} \frac{\partial \alpha_3}{\mu_{a,3}} = \left[ D_2 n_2^2 \alpha_2 \beta_{4,3} \cosh(\alpha_2 l_2) + D_3 n_3^2 \sinh(\alpha_2 l_2) (\gamma_4 + \alpha_3 \gamma_{4,3}) \right] \frac{\partial \alpha_3}{\partial \mu_{a,3}}. \quad (\text{S42})$$

$$\frac{\partial \gamma_3}{\partial \alpha_3} \frac{\partial \alpha_3}{\mu_{a,3}} = \left[ D_2 n_2^2 \alpha_2 \beta_{4,3} \sinh(\alpha_2 l_2) + D_3 n_3^2 \cosh(\alpha_2 l_2) (\gamma_4 + \alpha_3 \gamma_{4,3}) \right] \frac{\partial \alpha_3}{\partial \mu_{a,3}}. \quad (\text{S43})$$

$$\frac{\partial \beta_4}{\partial \alpha_3} \frac{\partial \alpha_3}{\mu_{a,3}} = \left\{ D_3 n_3^2 [\cosh(\alpha_3 l_3) + \alpha_3 l_3 \sinh(\alpha_3 l_3)] + D_4 n_4^2 \alpha_4 l_3 \cosh(\alpha_3 l_3) \right\} \frac{\partial \alpha_3}{\partial \mu_{a,3}} \quad (\text{S44})$$

$$\frac{\partial \gamma_4}{\partial \alpha_3} \frac{\partial \alpha_3}{\mu_{a,3}} = \left\{ D_3 n_3^2 [\sinh(\alpha_3 l_3) + \alpha_3 l_3 \cosh(\alpha_3 l_3)] + D_4 n_4^2 \alpha_4 l_3 \sinh(\alpha_3 l_3) \right\} \frac{\partial \alpha_3}{\partial \mu_{a,3}}. \quad (\text{S45})$$

$$\frac{\partial \beta_4}{\partial \mu_{a,4}} = D_4 n_4^2 \cosh(\alpha_3 l_3) \frac{\partial \alpha_4}{\partial \mu_{a,4}} \quad (\text{S46})$$

$$\frac{\partial \gamma_4}{\partial \mu_{a,3}} = D_4 n_4^2 \cosh(\alpha_3 l_3) \frac{\partial \alpha_4}{\partial \mu_{a,4}}. \quad (\text{S47})$$

Here, we have used relations which are analogous to Eq. (S29) for  $\beta_{4,3}$ ,  $\gamma_{4,3}$ ,  $\beta_{3,3}$  and  $\gamma_{3,3}$ . With all these derivatives, we can refer again to the following formula:

$$\frac{\partial G_1(\alpha)}{\partial \mu_{a,j}} = \left( \frac{\partial \mathcal{A}}{\partial \alpha_j} + \frac{\partial \mathcal{B}}{\partial \alpha_j} \mathcal{C} + \mathcal{B} \frac{\partial \mathcal{C}}{\partial \alpha_j} \right) \frac{\partial \alpha_j}{\partial \mu_{a,j}}, \quad (\text{S48})$$

that has to be used entirely to calculate  $L_1$ . The only term that does not vanish for  $L_2$ ,  $L_3$  and  $L_4$  is  $\mathcal{B} \frac{\partial \mathcal{C}}{\partial \alpha_j}$ , thus:

$$\frac{\partial G_1}{\partial \alpha_1} \frac{\partial \alpha_1}{\partial \mu_{a,1}} = \left( \frac{\partial \mathcal{A}}{\partial \alpha_1} + \frac{\partial \mathcal{B}}{\partial \alpha_1} \mathcal{C} + \frac{\partial \mathcal{C}}{\partial \alpha_1} \mathcal{B} \right) \frac{\partial \alpha_1}{\mu_{a,1}} \quad (\text{S49})$$

$$\frac{\partial G_1}{\partial \alpha_2} \frac{\partial \alpha_2}{\partial \mu_{a,2}} = \frac{\partial \mathcal{C}}{\partial \alpha_2} \frac{\partial \alpha_2}{\partial \mu_{a,2}} \cdot \mathcal{B} \quad (\text{S50})$$

$$\frac{\partial G_1}{\partial \alpha_3} \frac{\partial \alpha_3}{\partial \mu_{a,3}} = \frac{\partial \mathcal{C}}{\partial \alpha_3} \frac{\partial \alpha_3}{\partial \mu_{a,3}} \cdot \mathcal{B}. \quad (\text{S51})$$

$$\frac{\partial G_1}{\partial \alpha_4} \frac{\partial \alpha_4}{\partial \mu_{a,4}} = \frac{\partial \mathcal{C}}{\partial \alpha_4} \frac{\partial \alpha_4}{\partial \mu_{a,4}} \cdot \mathcal{B}. \quad (\text{S52})$$

The remaining procedure, i.e. the definitions of  $L_i$  is straightforward and identical to that described in the previous section.
